# Supplementary material for: Psychological Characteristics of Lung Cancer Patients During the 2019 Novel Coronavirus Outbreak: A Cross-Sectional and Longitudinal Study Based on a Propensity Score-Matched Population
Source: Research Square preprint supplement (doi:10.21203/rs.3.rs-932424/v1), 2021-11-01
Supplement: Supplementary file 1 [file 9a69122060654ab223633a91.docx]

**eTable 3 Ranking and comparing problems from the CDT list reported by uptrend period and decline period of COVID-19**

| **Rank** | **Uptrend Period (n=127)** | | | **Decline Period (n=126)** | | |
| --- | --- | --- | --- | --- | --- | --- |
| **Problems** | **N** | **%** | **Problems** | **N** | **%** |
| 1 | Worry | 51 | 40.2 | Worry | 49 | 38.9 |
| 2 | Nervousness | 21 | 16.5 | Sleep | 22 | 17.5 |
| 3 | Sleep | 18 | 14.2 | Nervousness | 17 | 13.5 |
| 4 | Financial | 12 | 9.4 | Financial | 11 | 8.7 |
| 5 | Breathing | 9 | 7.1 | Constipation | 10 | 7.9 |
| 6 | Eating | 6 | 4.7 | Breathing | 6 | 4.8 |
| 7 | Fatigue | 4 | 3.1 | Fatigue | 5 | 4.0 |
| 8 | Pain | 3 | 2.4 | Eating | 3 | 2.4 |
| 9 | Constipation | 2 | 1.6 | Pain | 2 | 1.6 |
| 10 | Nausea | 1 | 0.8 | Nausea | 1 | 0.8 |
